# Supplementary material for: Role of Chemistry and Crystal Structure on the Electronic Defect States in Cs-Based Halide Perovskites
Source: MDPI journal article supplement (doi:10.3390/ma14041032), 2021-02-22
Supplement: s1 [file s1]

# Role of Chemistry and Crystal Structure on the Electronic Defect States in Cs-Based Halide Perovskites

Anirban Naskar, Rabi Khanal and Samrat Choudhury \*

Materials Science and Engineering Program, University of Idaho, Moscow, ID 83844, USA; nask9705@vandals.uidaho.edu (A.N.); rkhanal@uidaho.edu (R.K.)

\* Correspondence: samrat@uidaho.edu

## 1. LOBSTER COOP Plot for Cubic CsCaBr<sub>3</sub> and Orthorhombic CsSrI<sub>3</sub> in Presence of Antisite Defect

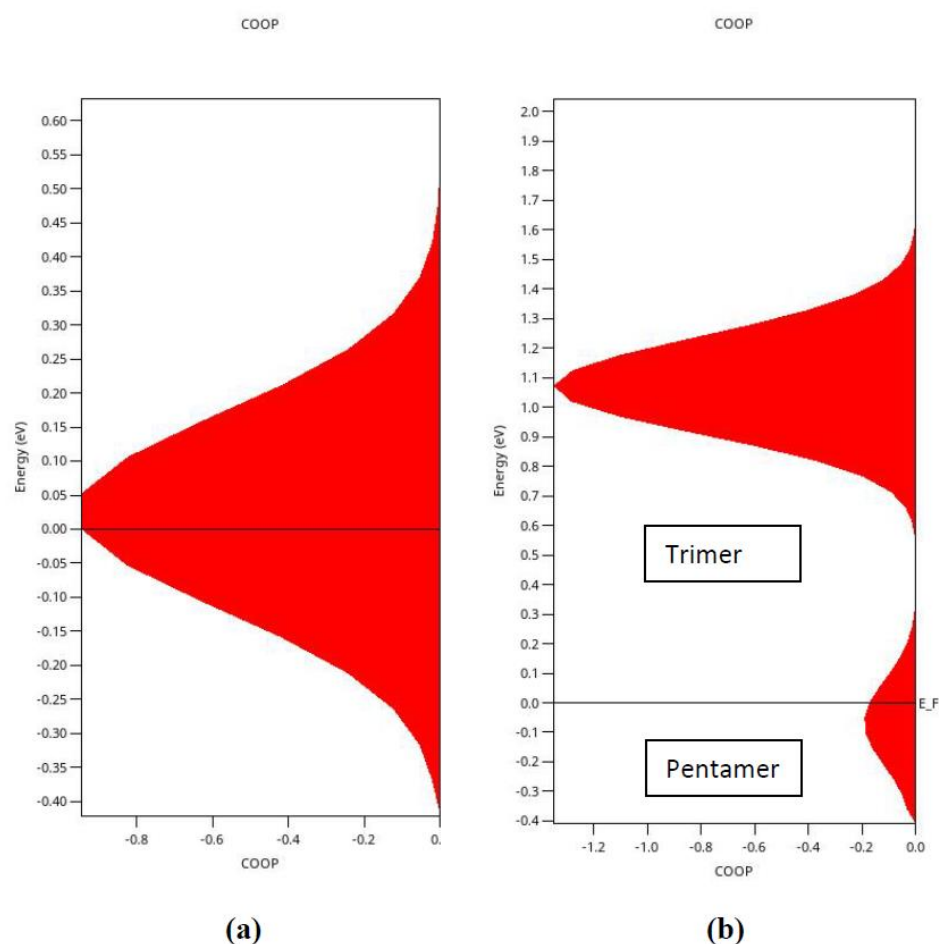

**Figure S1.** Crystal orbital overlap population (COOP) analysis for (a) BrCa antisite defect with surrounding Br atoms in cubic CsCaBr<sub>3</sub> and (b) ISr antisite defect with surrounding I atoms in the orthorhombic CsSrI<sub>3</sub>.

**Publisher's Note:** MDPI stays neutral with regard to jurisdictional claims in published maps and institutional affiliations.

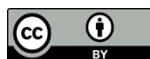

**Copyright:** © 2021 by the authors. Licensee MDPI, Basel, Switzerland. This article is an open access article distributed under the terms and conditions of the Creative Commons Attribution (CC BY) license (<http://creativecommons.org/licenses/by/4.0/>).

## 2. Table Representation Bond-Length Change for Cubic $\text{CsCaX}_3$ ( $\text{X} = \text{F}, \text{Cl}, \text{Br}$ and $\text{I}$ )

**Table S1.** Change in the Bond-length of  $\text{Ca-X}$  ( $\text{X} = \text{F}, \text{Cl}, \text{Br}, \text{I}$ ) before and after introducing the  $\text{XCa}$  antisite defect.

| Systems           | Ca–X Bond-Length in Pure Structure (Å) | $\text{X}_{\text{Ca}}\text{-X}$ bond-Length after Introducing the Defect (Å) | Percent Change in Bond-Length (%) |
|-------------------|----------------------------------------|------------------------------------------------------------------------------|-----------------------------------|
| $\text{CsCaI}_3$  | 3.11                                   | 3.22                                                                         | 3.5                               |
| $\text{CsCaBr}_3$ | 2.88                                   | 2.95                                                                         | 2.4                               |
| $\text{CsCaCl}_3$ | 2.73                                   | 2.78                                                                         | 1.8                               |
| $\text{CsCaF}_3$  | 2.24                                   | 2.27                                                                         | 1.3                               |

## 3. Cubic ( $\text{Pm}\bar{3}\text{m}$ ) and Orthorhombic ( $\text{Pnma}$ ) $\text{ABX}_3$ representation

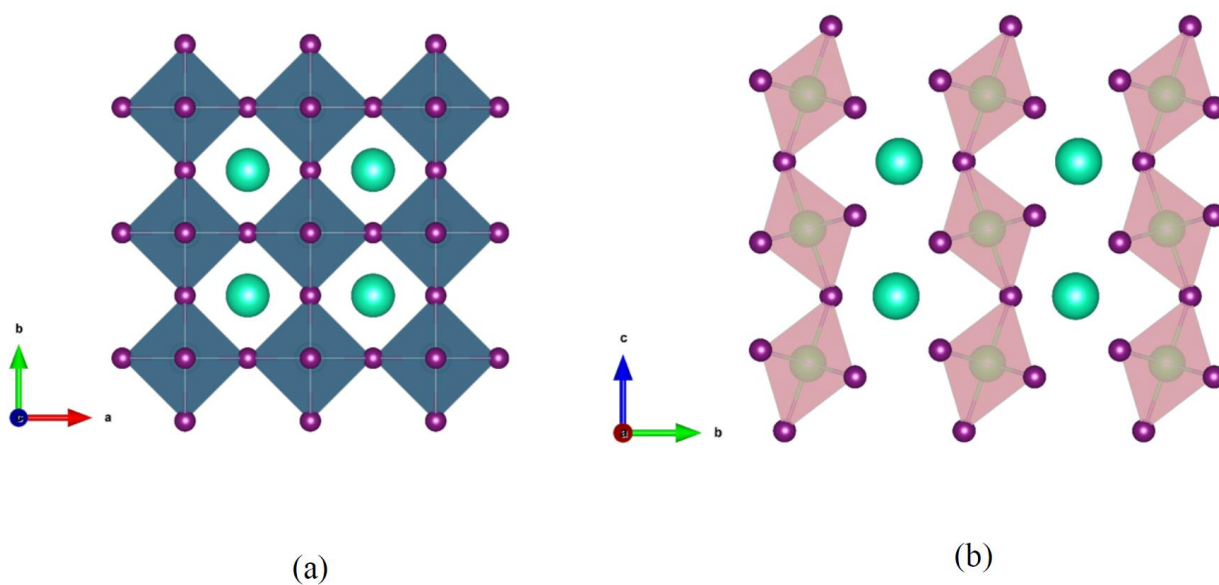

**Figure S2.** Representation of (a) Cubic ( $\text{Pm}\bar{3}\text{m}$ ) and (b) Orthorhombic ( $\text{Pnma}$ )  $\text{ABX}_3$ .

#### 4. Axial and Apical Positions (Angles) in Orthorhombic $\text{CsSrI}_3$

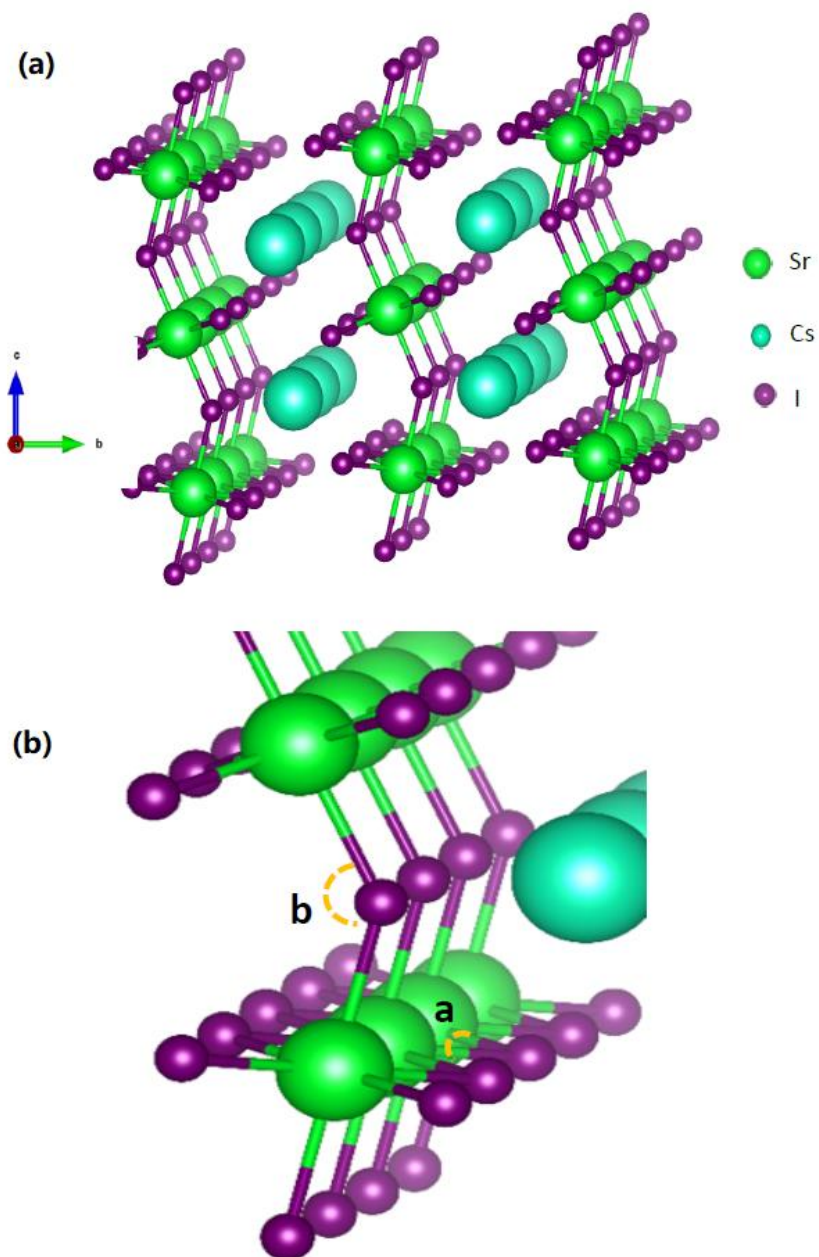

**Figure S3.** (a) Axial and (b) Apical bonds in orthorhombic  $\text{CsSrI}_3$ .

### 5. Computed Lattice Parameters of $ABX_3$ (A = Cs, M = Ca, Sr, Ba and X = F, Cl, Br, I)

**Table S2.** The optimized lattice parameter (Å) of cubic  $ABX_3$  (A = Cs, M = Ca, Sr, Ba and X = F, Cl, Br, I).

| Systems             | a    | b    | c    |
|---------------------|------|------|------|
| CsCaF <sub>3</sub>  | 4.58 | 4.58 | 4.58 |
| CsCaCl <sub>3</sub> | 5.46 | 5.46 | 5.46 |
| CsCaBr <sub>3</sub> | 5.77 | 5.77 | 5.77 |
| CsCaI <sub>3</sub>  | 6.21 | 6.21 | 6.21 |
| CsSrF <sub>3</sub>  | 4.82 | 4.82 | 4.82 |
| CsSrCl <sub>3</sub> | 5.74 | 5.74 | 5.74 |
| CsSrBr <sub>3</sub> | 6.05 | 6.05 | 6.05 |
| CsSrI <sub>3</sub>  | 6.47 | 6.47 | 6.47 |
| CsBaF <sub>3</sub>  | 5.15 | 5.15 | 5.15 |
| CsBaCl <sub>3</sub> | 6.07 | 6.07 | 6.07 |
| CsBaBr <sub>3</sub> | 6.34 | 6.34 | 6.34 |
| CsBaI <sub>3</sub>  | 6.82 | 6.82 | 6.82 |

**Table S3.** The optimized lattice parameter (Å) of orthorhombic  $ABX_3$  (A = Cs, M = Ca, Sr, Ba and X = F, Cl, Br, I).

| Systems             | a    | b     | c     |
|---------------------|------|-------|-------|
| CsCaF <sub>3</sub>  | 3.67 | 12.50 | 8.68  |
| CsCaCl <sub>3</sub> | 4.26 | 14.59 | 10.51 |
| CsCaBr <sub>3</sub> | 4.50 | 15.14 | 11.14 |
| CsCaI <sub>3</sub>  | 4.85 | 16.07 | 12.01 |
| CsSrF <sub>3</sub>  | 3.84 | 12.79 | 9.09  |
| CsSrCl <sub>3</sub> | 4.44 | 14.84 | 10.90 |
| CsSrBr <sub>3</sub> | 4.66 | 15.39 | 11.52 |
| CsSrI <sub>3</sub>  | 5.01 | 16.29 | 12.39 |
| CsBaF <sub>3</sub>  | 4.05 | 13.28 | 9.49  |
| CsBaCl <sub>3</sub> | 4.64 | 15.28 | 11.26 |
| CsBaBr <sub>3</sub> | 4.85 | 15.88 | 11.87 |
| CsBaI <sub>3</sub>  | 5.18 | 16.53 | 12.84 |

### 6. Electronic Band Structures of $ABX_3$ with and without Antisite Defect

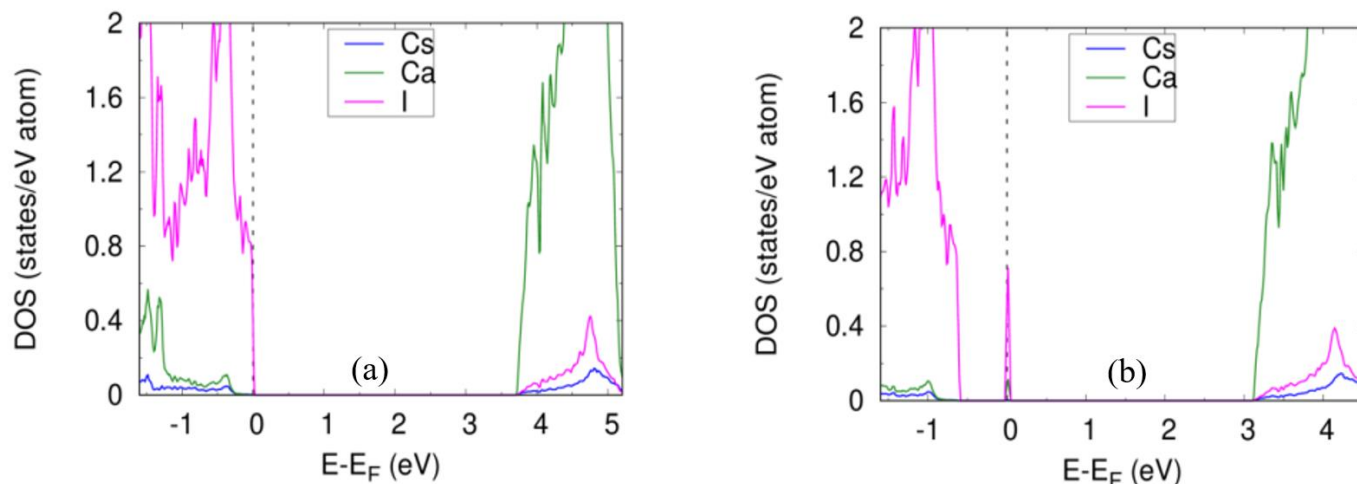

**Figure S4.** The partial DOS of bulk cubic  $CsCaI_3$  (a) without defect and (b) with antisite defect.

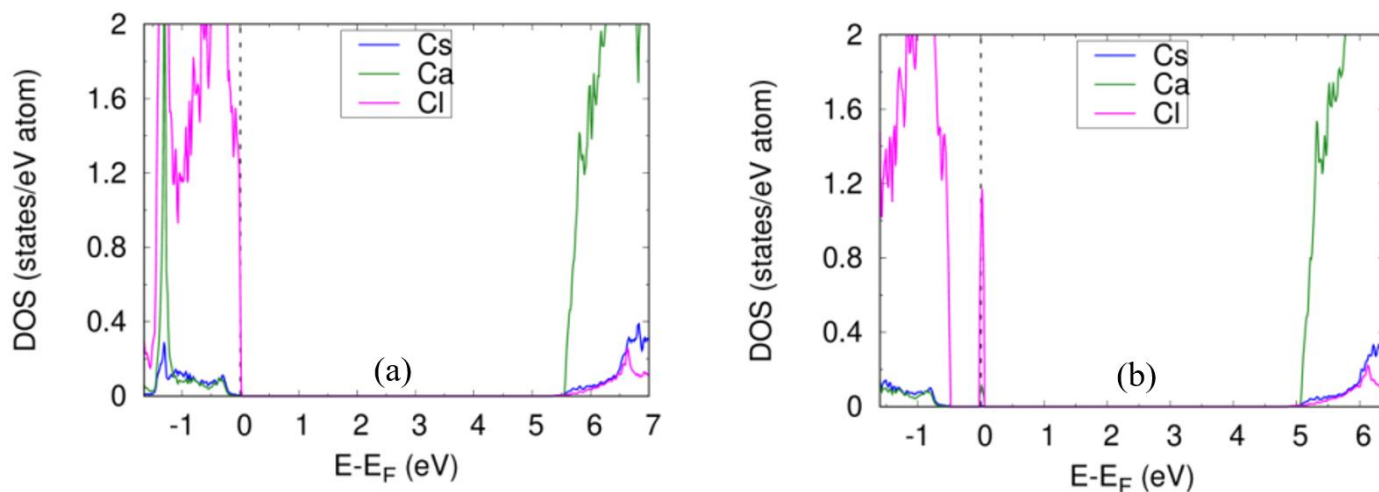

**Figure S5.** The partial DOS of bulk cubic  $CsCaCl_3$  (a) without defect and (b) with antisite defect.

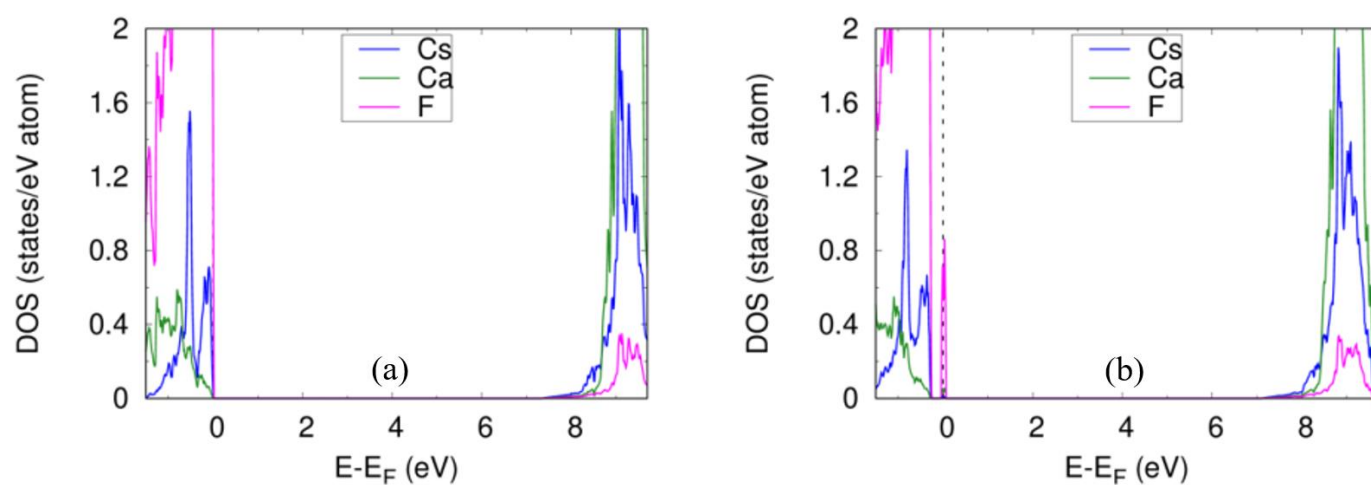

**Figure S6.** The partial DOS of bulk cubic  $CsCaF_3$  (a) without defect and (b) with antisite defect.

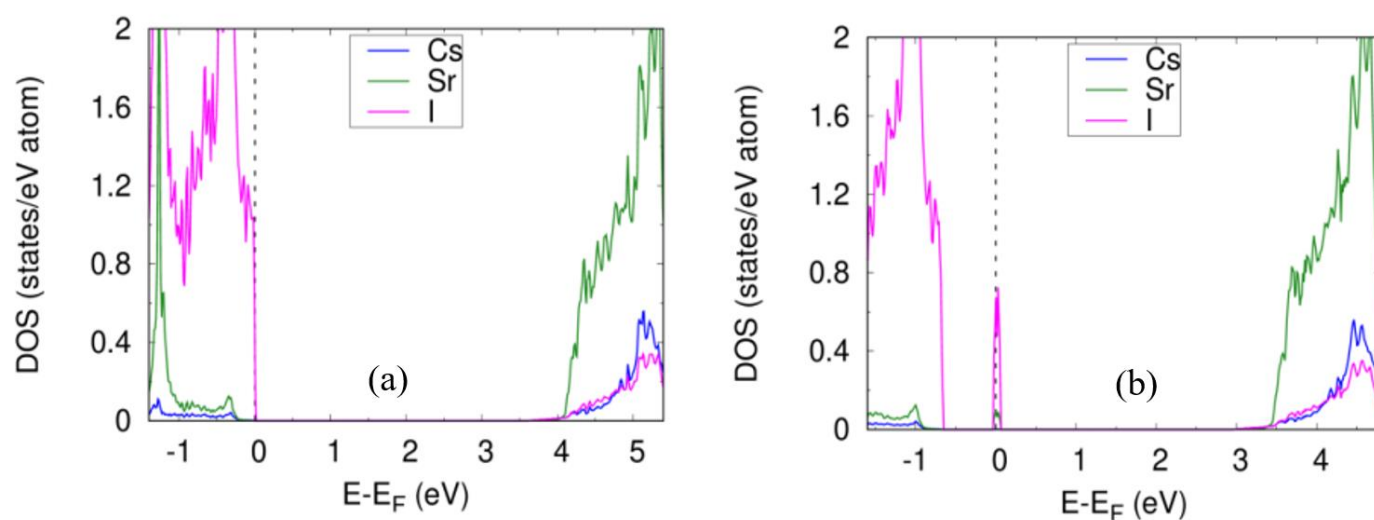

Figure S7. The partial DOS of bulk cubic CsSrI<sub>3</sub> (a) without defect and (b) with antisite defect.

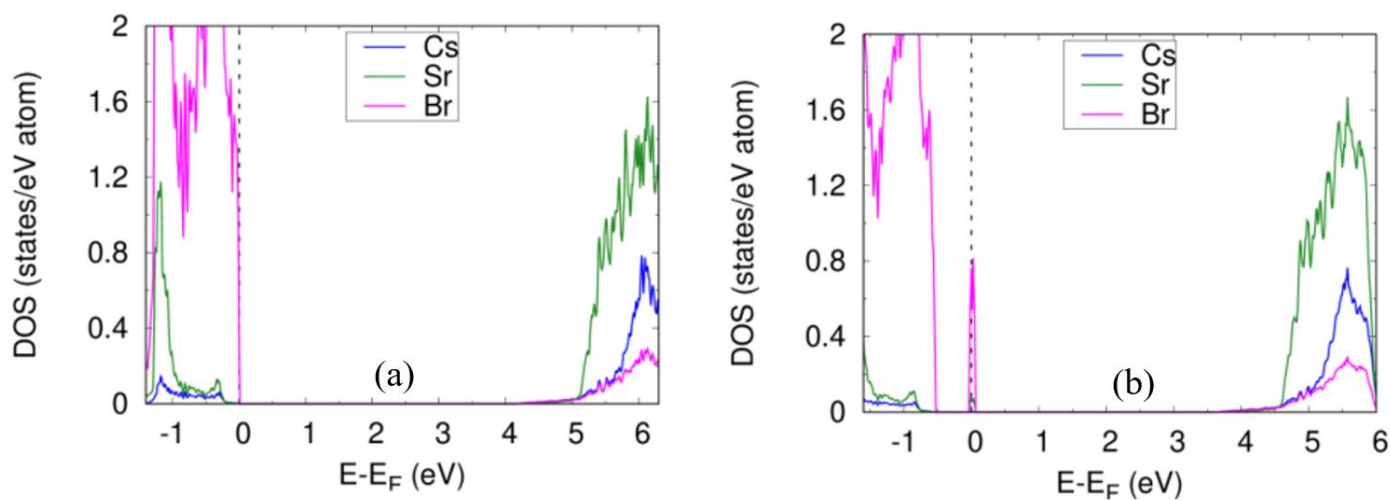

Figure S8. The partial DOS of bulk cubic CsSrBr<sub>3</sub> (a) without defect and (b) with antisite defect.

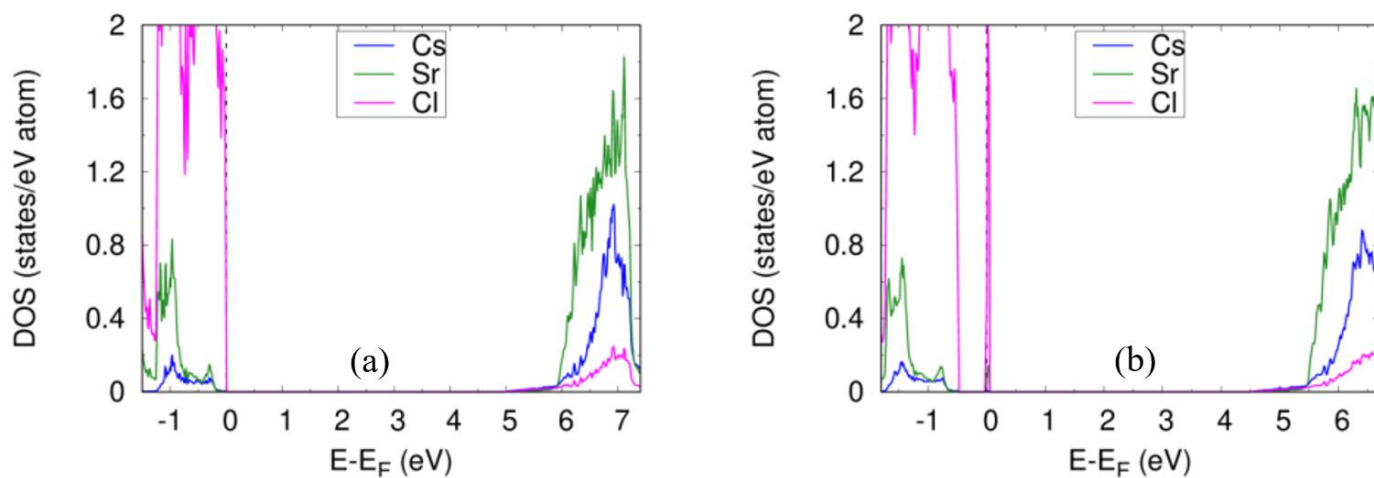

Figure S9. The partial DOS of bulk cubic CsSrCl<sub>3</sub> (a) without defect and (b) with antisite defect.



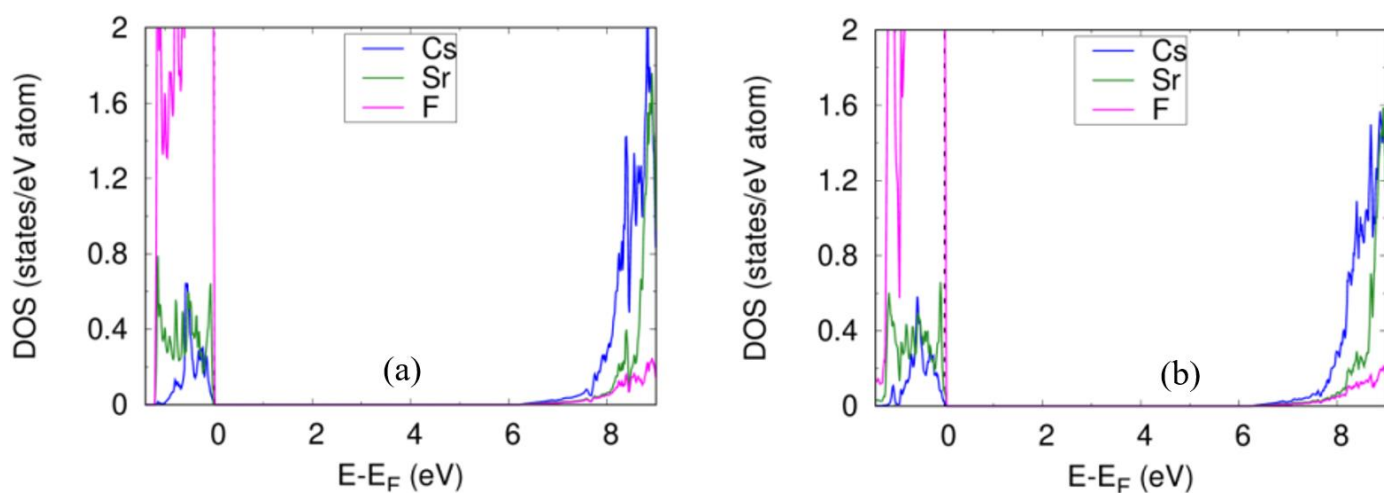

Figure S10. The partial DOS of bulk cubic  $\text{CsSrF}_3$  (a) without defect and (b) with antisite defect.

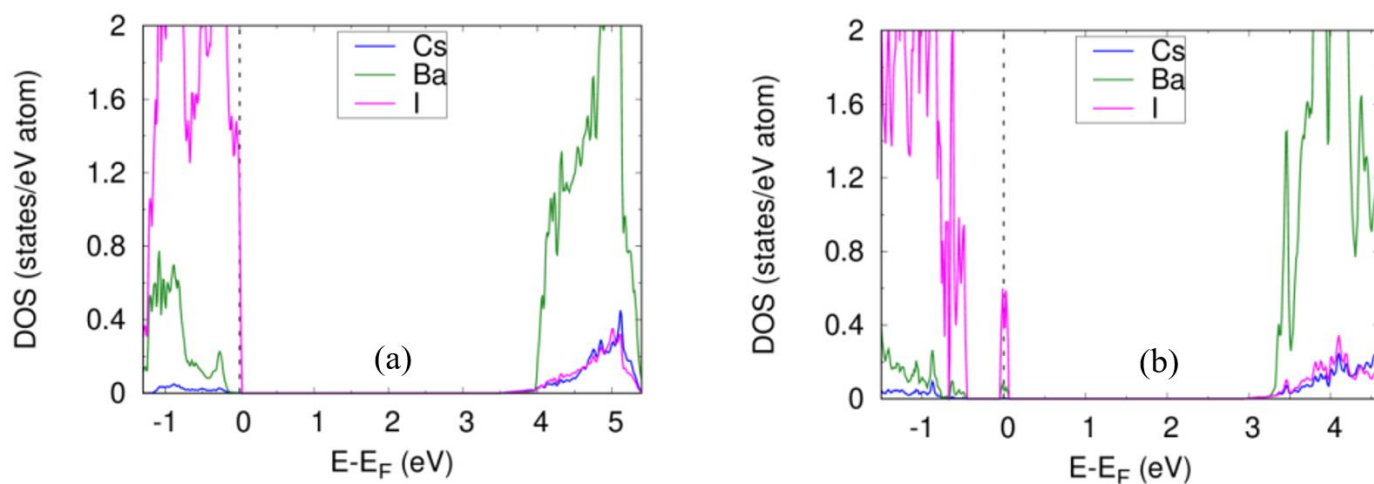

Figure S11. The partial DOS of bulk cubic  $\text{CsBaI}_3$  (a) without defect and (b) with antisite defect.

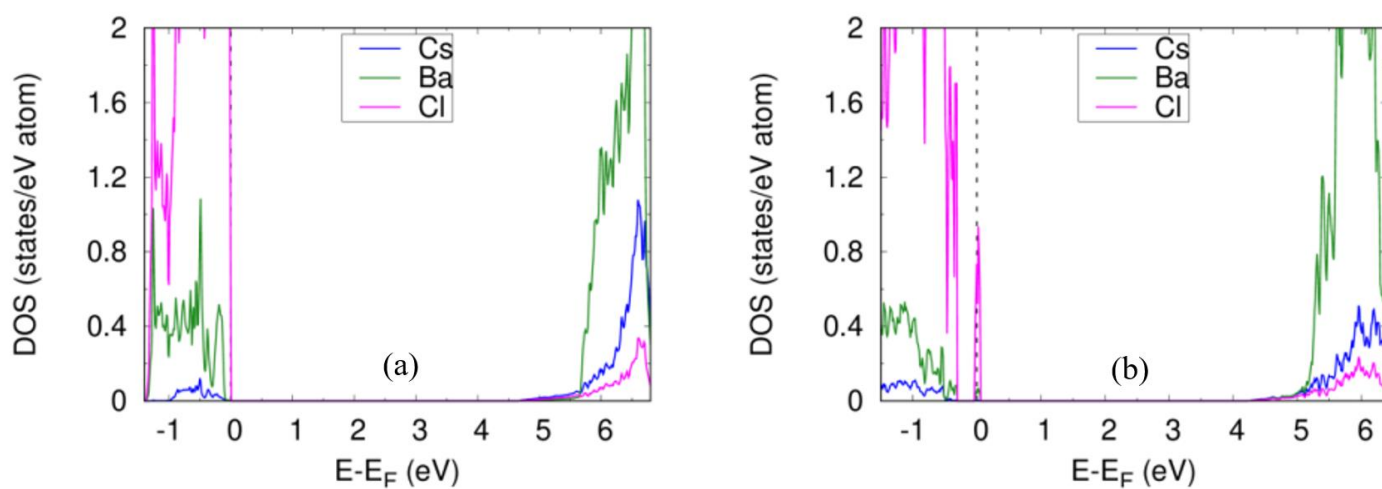

Figure S12. The partial DOS of bulk cubic  $\text{CsBaCl}_3$  (a) without defect and (b) with antisite defect.

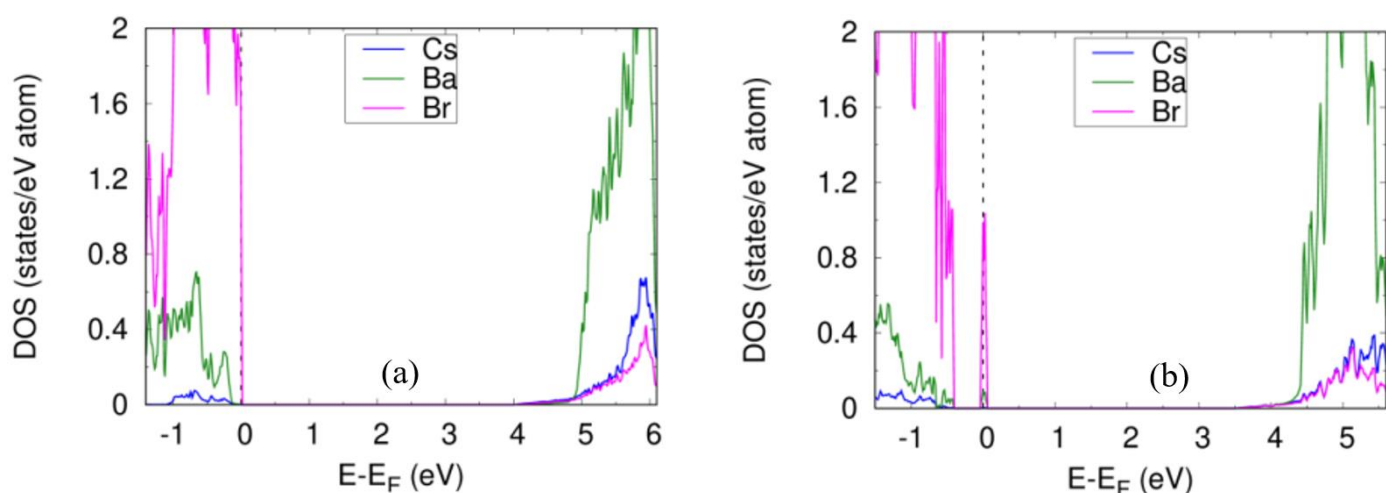

Figure S13. The partial DOS of bulk cubic CsBaBr<sub>3</sub> (a) without defect and (b) with antisite defect.

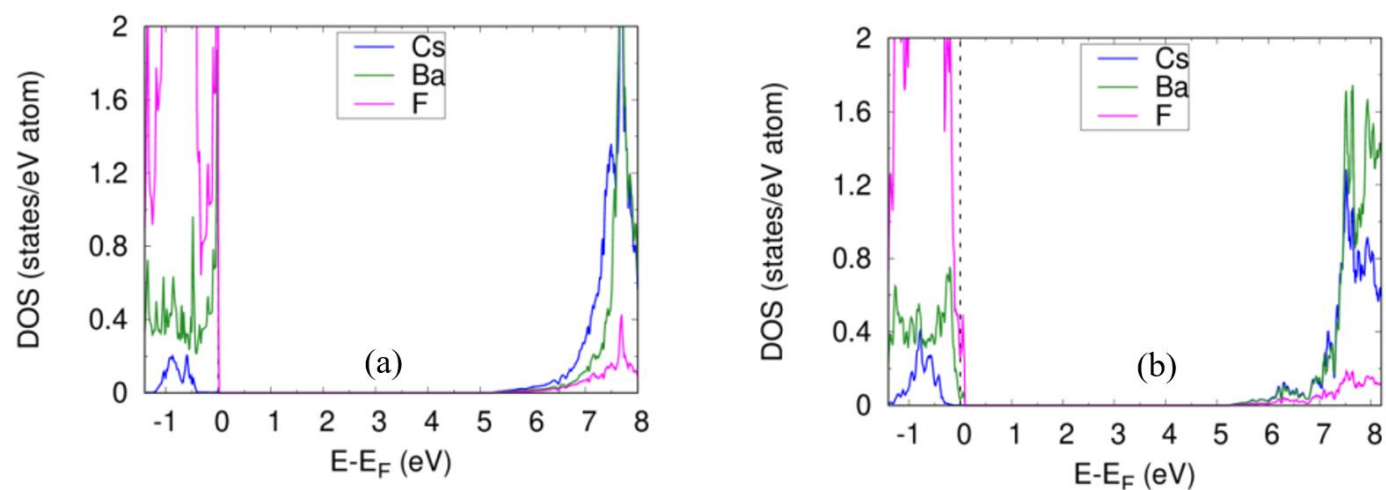

Figure S14. The partial DOS of bulk cubic CsBaF<sub>3</sub> (a) without defect and (b) with antisite defect.

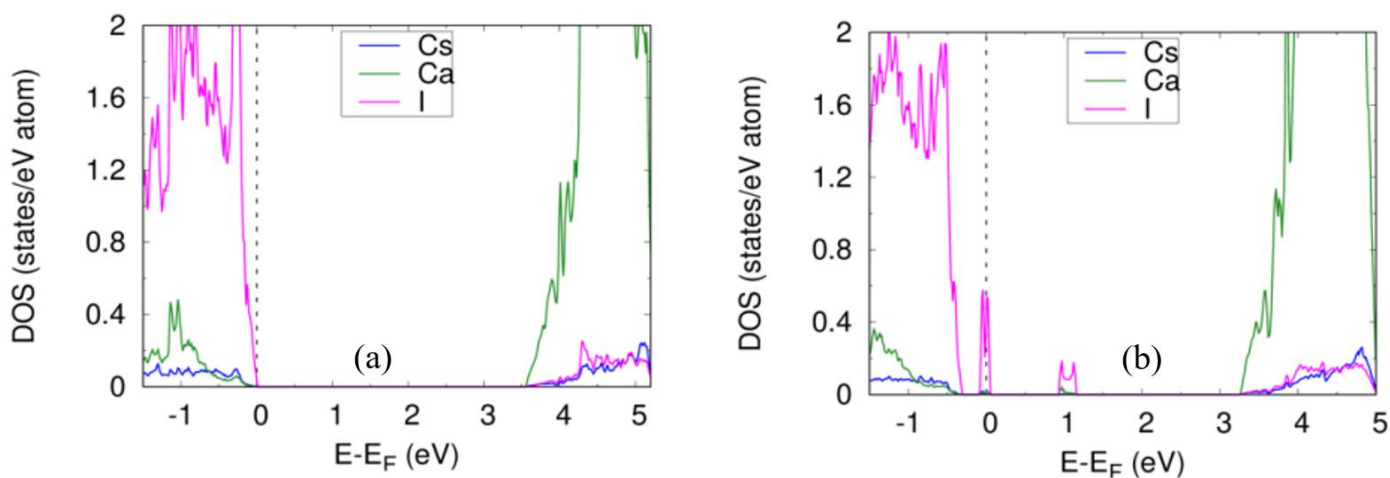

Figure S15. The partial DOS of bulk orthorhombic CsCaI<sub>3</sub> (a) without defect and (b) with antisite defect.



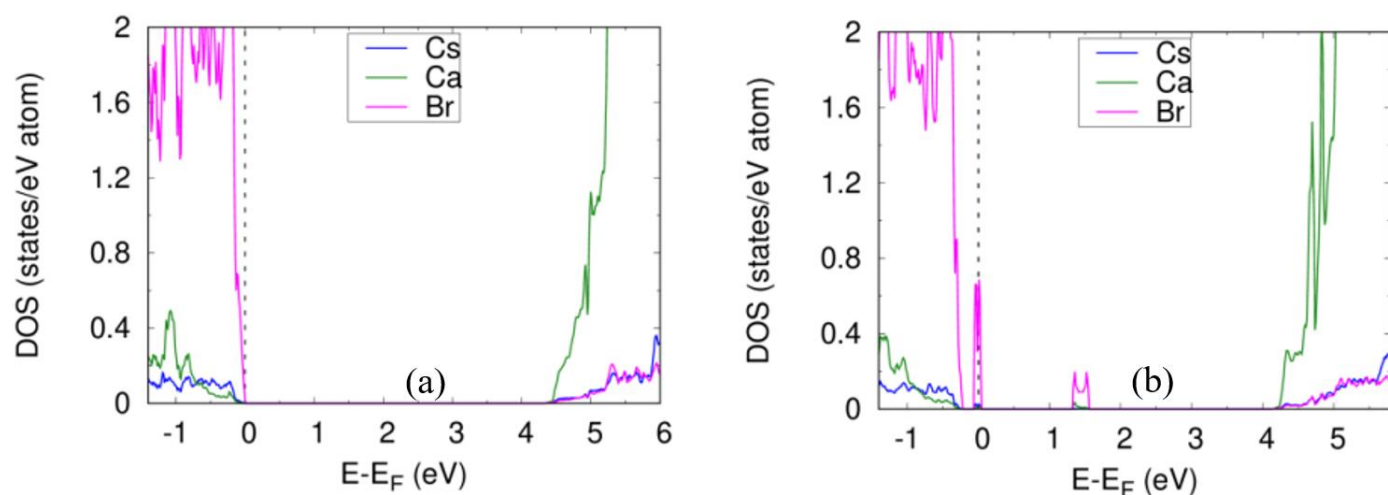

**Figure S16.** The partial DOS of bulk orthorhombic CsCaBr<sub>3</sub> (a) without defect and (b) with antisite defect.

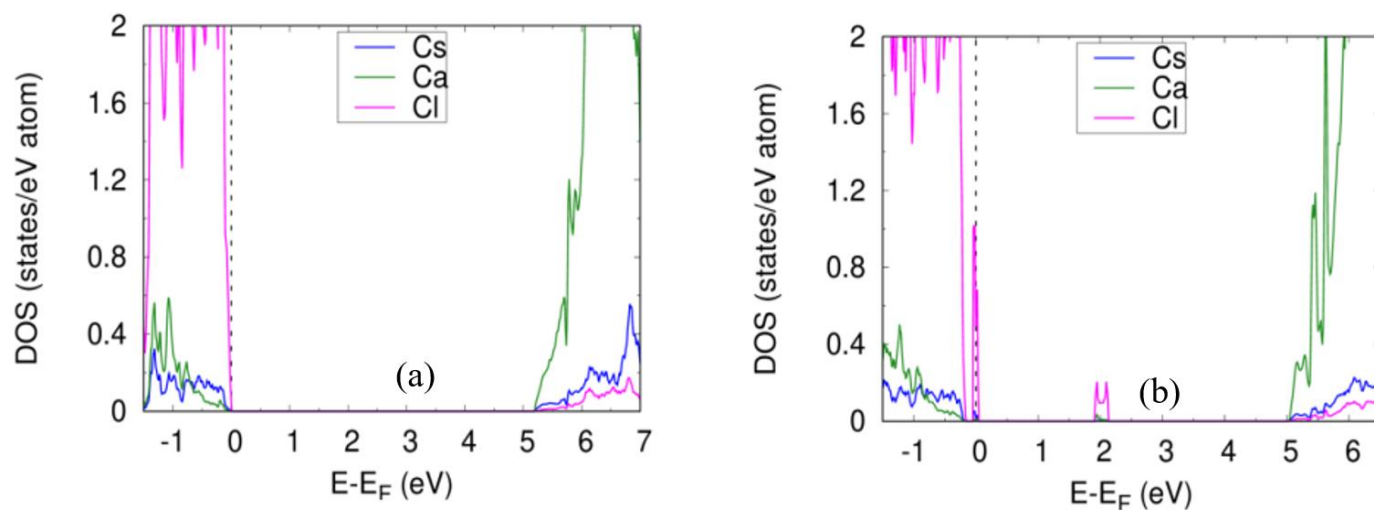

**Figure S17.** The partial DOS of bulk orthorhombic CsCaCl<sub>3</sub> (a) without defect and (b) with antisite defect.

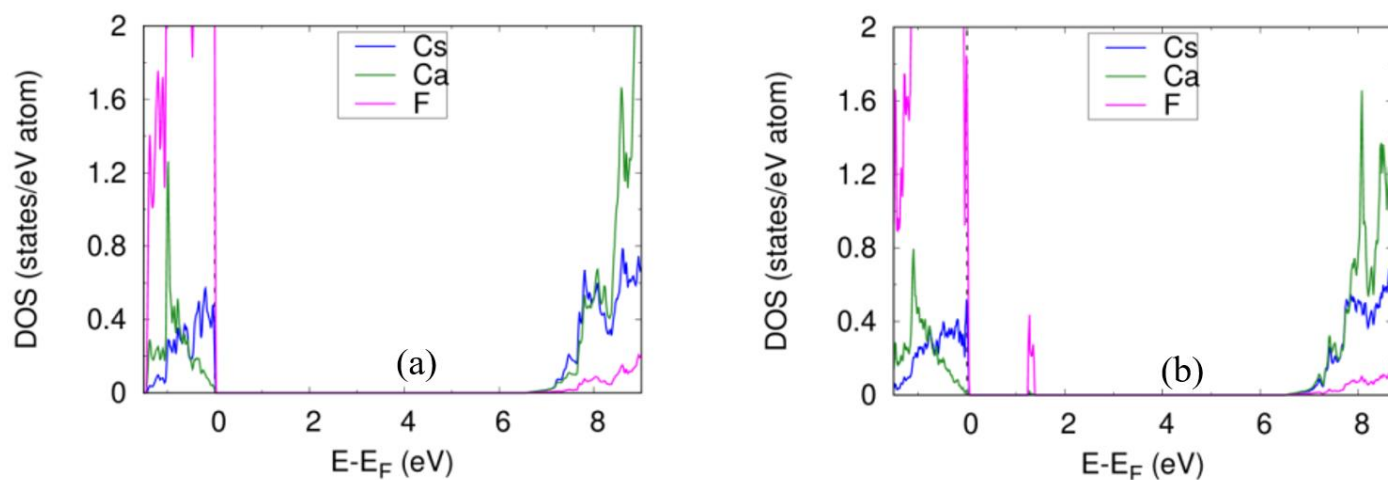

**Figure S18.** The partial DOS of bulk orthorhombic CsCaF<sub>3</sub> (a) without defect and (b) with antisite defect.

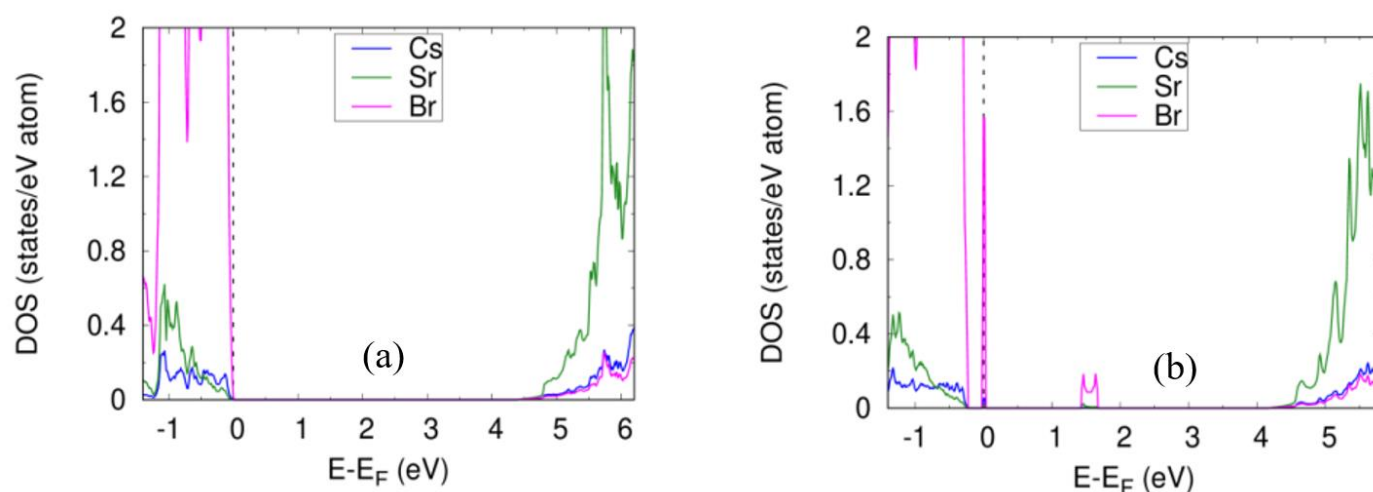

**Figure S19.** The partial DOS of bulk orthorhombic CsSrBr<sub>3</sub> (a) without defect and (b) with antisite defect.

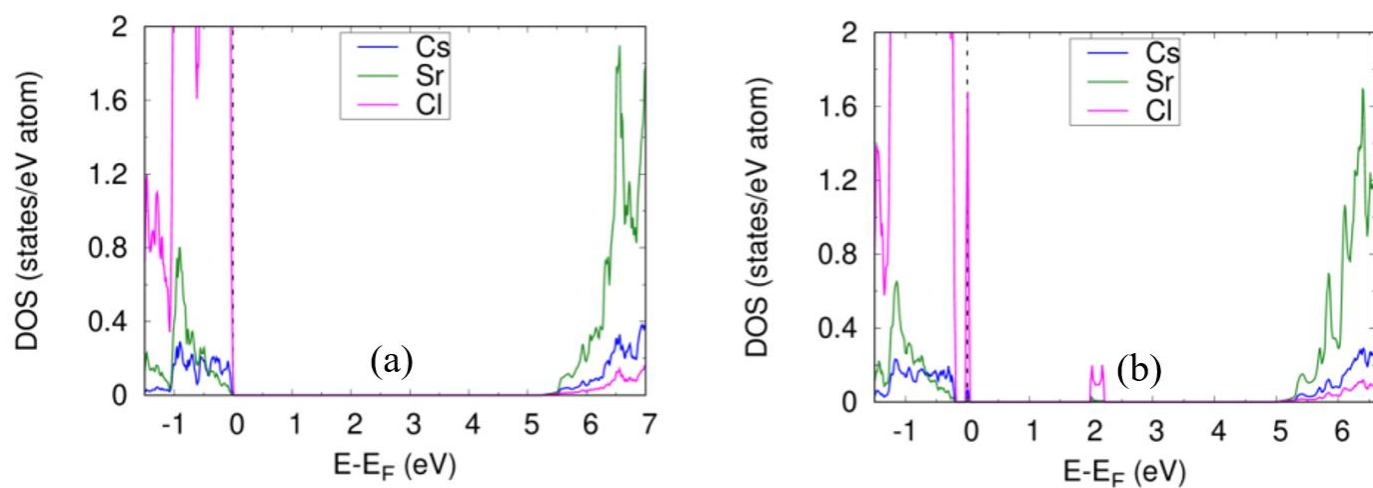

**Figure S20.** The partial DOS of bulk orthorhombic CsSrCl<sub>3</sub> (a) without defect and (b) with antisite defect.

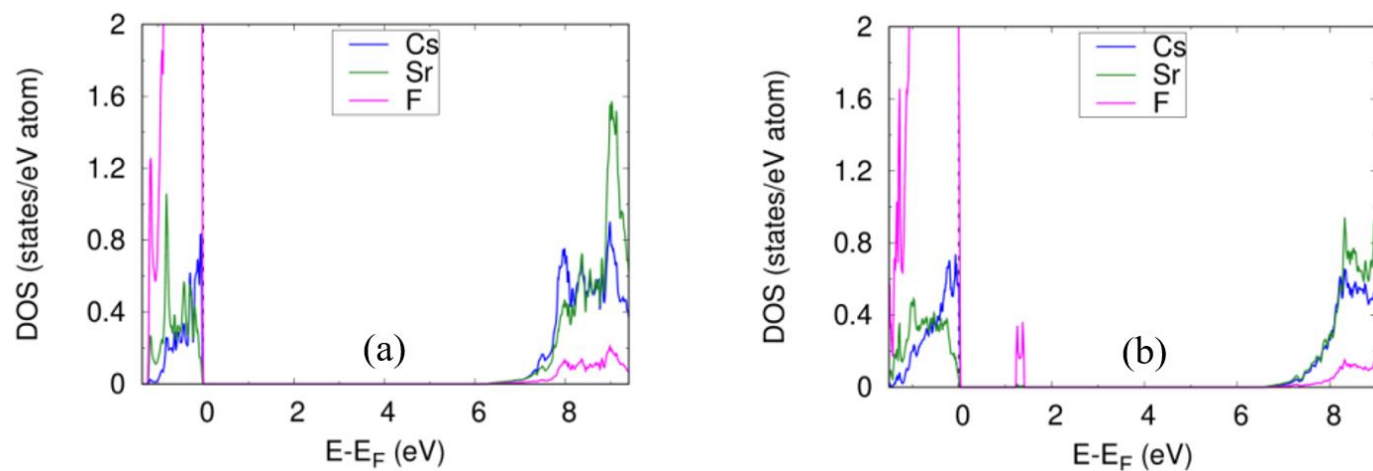

**Figure S21.** The partial DOS of bulk orthorhombic CsSrF<sub>3</sub> (a) without defect and (b) with antisite defect.

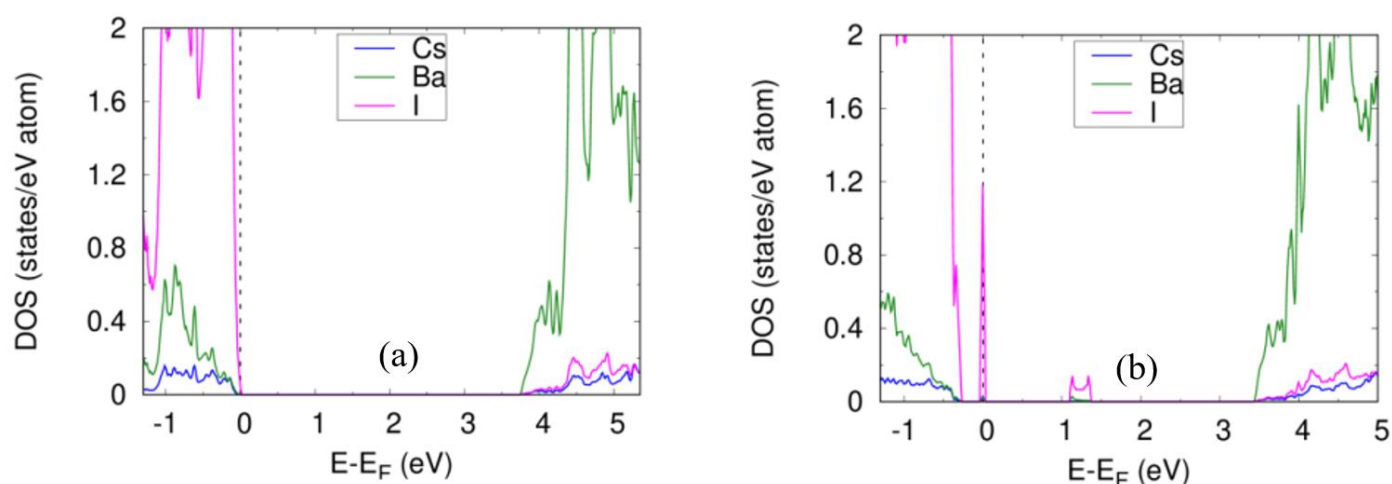

**Figure S22.** The partial DOS of bulk orthorhombic  $\text{CsBaI}_3$  (a) without defect and (b) with antisite defect.

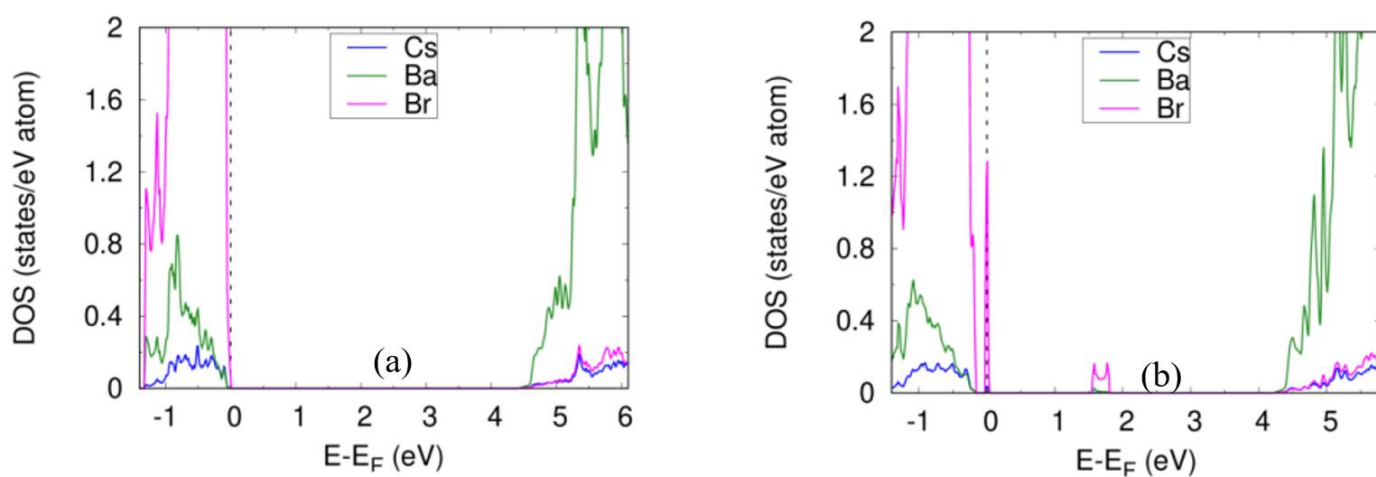

**Figure S23.** The partial DOS of bulk orthorhombic  $\text{CsBaBr}_3$  (a) without defect and (b) with antisite defect.

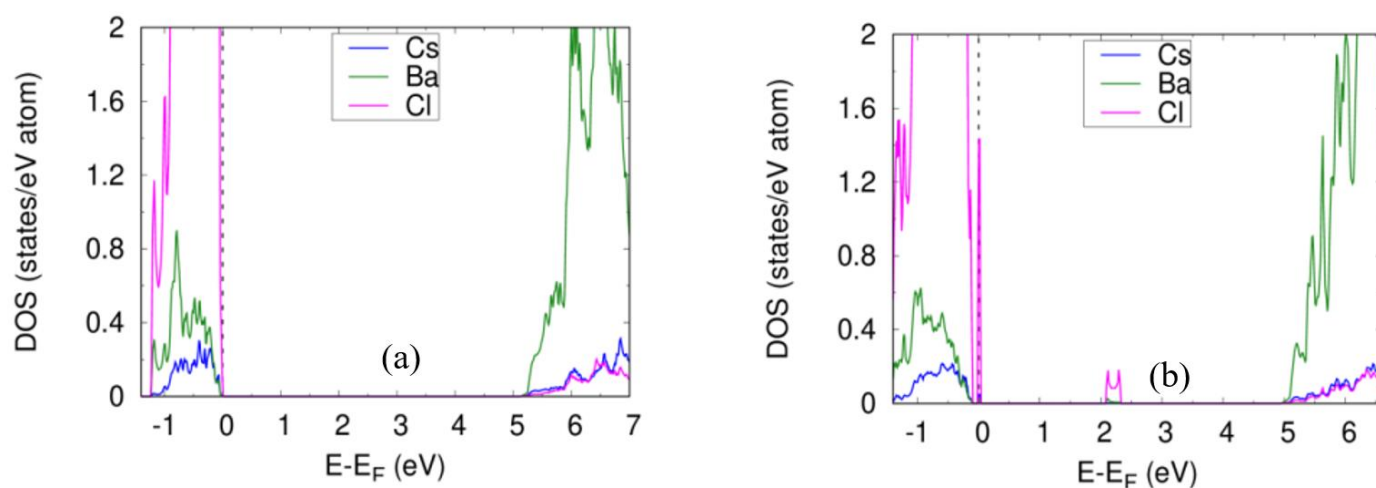

**Figure S24.** The partial DOS of bulk orthorhombic  $\text{CsBaCl}_3$  (a) without defect and (b) with antisite defect.

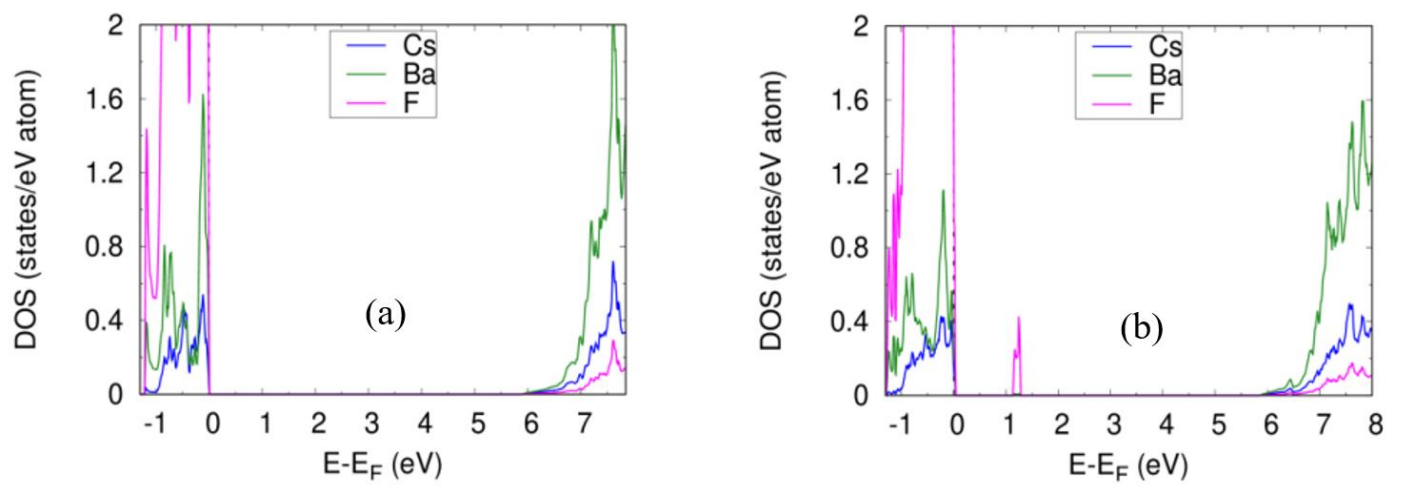

**Figure S25.** The partial DOS of bulk orthorhombic CsBaF<sub>3</sub> (a) without defect and (b) with antisite defect.
